# Supplementary material
Source: PubMed Central journal article supplement (PMC6102995)
Supplement: zam017188714s1.pdf [file zam017188714s1.pdf]

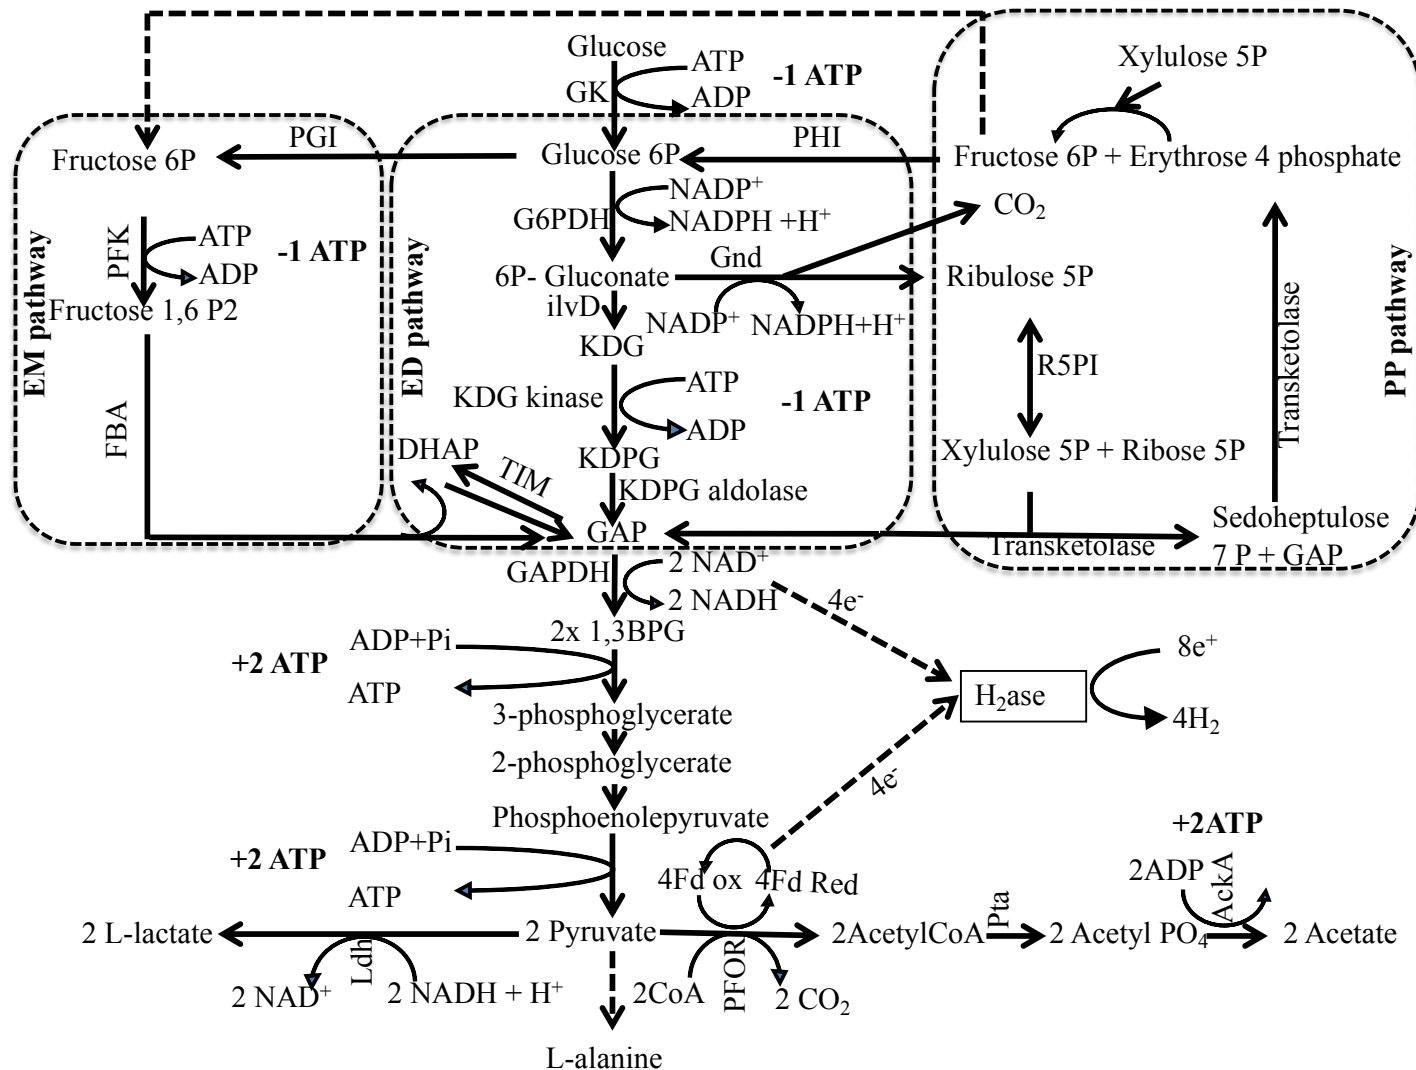

**Figure S1.** Proposed central metabolic pathways in *T. maritima* depicting ATP formation and hydrogen formation. **GK-** Glucose kinase, **PGI-** Phosphoglucose isomerase, **PFK-** Phosphofructokinase, **FBA-** Fructose-1,6-bisphosphate aldolase, **TIM-** Triose-phosphate isomerase, **G6PDH-** Glucose-6-phosphate dehydrogenase, **ilvD-** Phosphogluconate dehydratase, **gnd-** 6-phosphogluconate dehydrogenase, **KDG-** 2-keto-3-deoxygluconate, **KDPG-** 2-Keto-3- deoxy-6-phosphogluconate, **GAP-** Glycerldehyde -3-phosphate, **1,3 BPG-** 1,3- bisphosphoglycerate, **GAPDH-**Glyceraldehyde-3phosphate dehydrogenase, **H<sub>2</sub>ase-** Hydrogenase, **Ldh-** lactate dehydrogenase, **PFOR-** Pyruvate Ferredoxin oxidoreductase, **Pta-**Phosphate acetyltransferase, **AckA-** Acetate kinase.

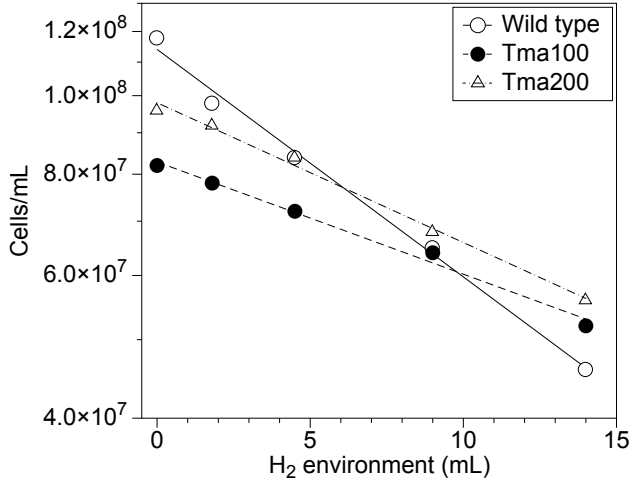

**Figure S2. Hydrogen resistance in various strains of *T. maritima*.** Tubes inoculated with  $4 \times 10^6$  cell of wild type, Tma100 and Tma200 were injected with varying amounts of H<sub>2</sub> (mL) in the headspace without any positive pressure. Tubes were incubated at 80°C for 24h.

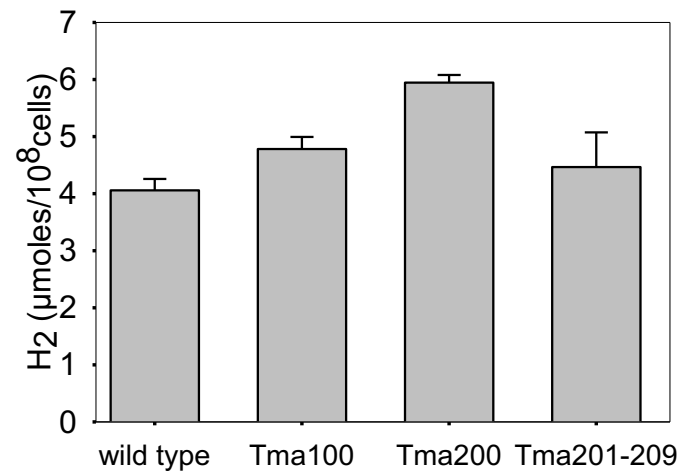

**Figure S3. Comparison of H<sub>2</sub> production by Tma100 and Tma200 in batch cultures.** Hydrogen was normalized to 10<sup>8</sup> cell/mL for all three strains. The error bars represent the standard deviations from two biological replicates.

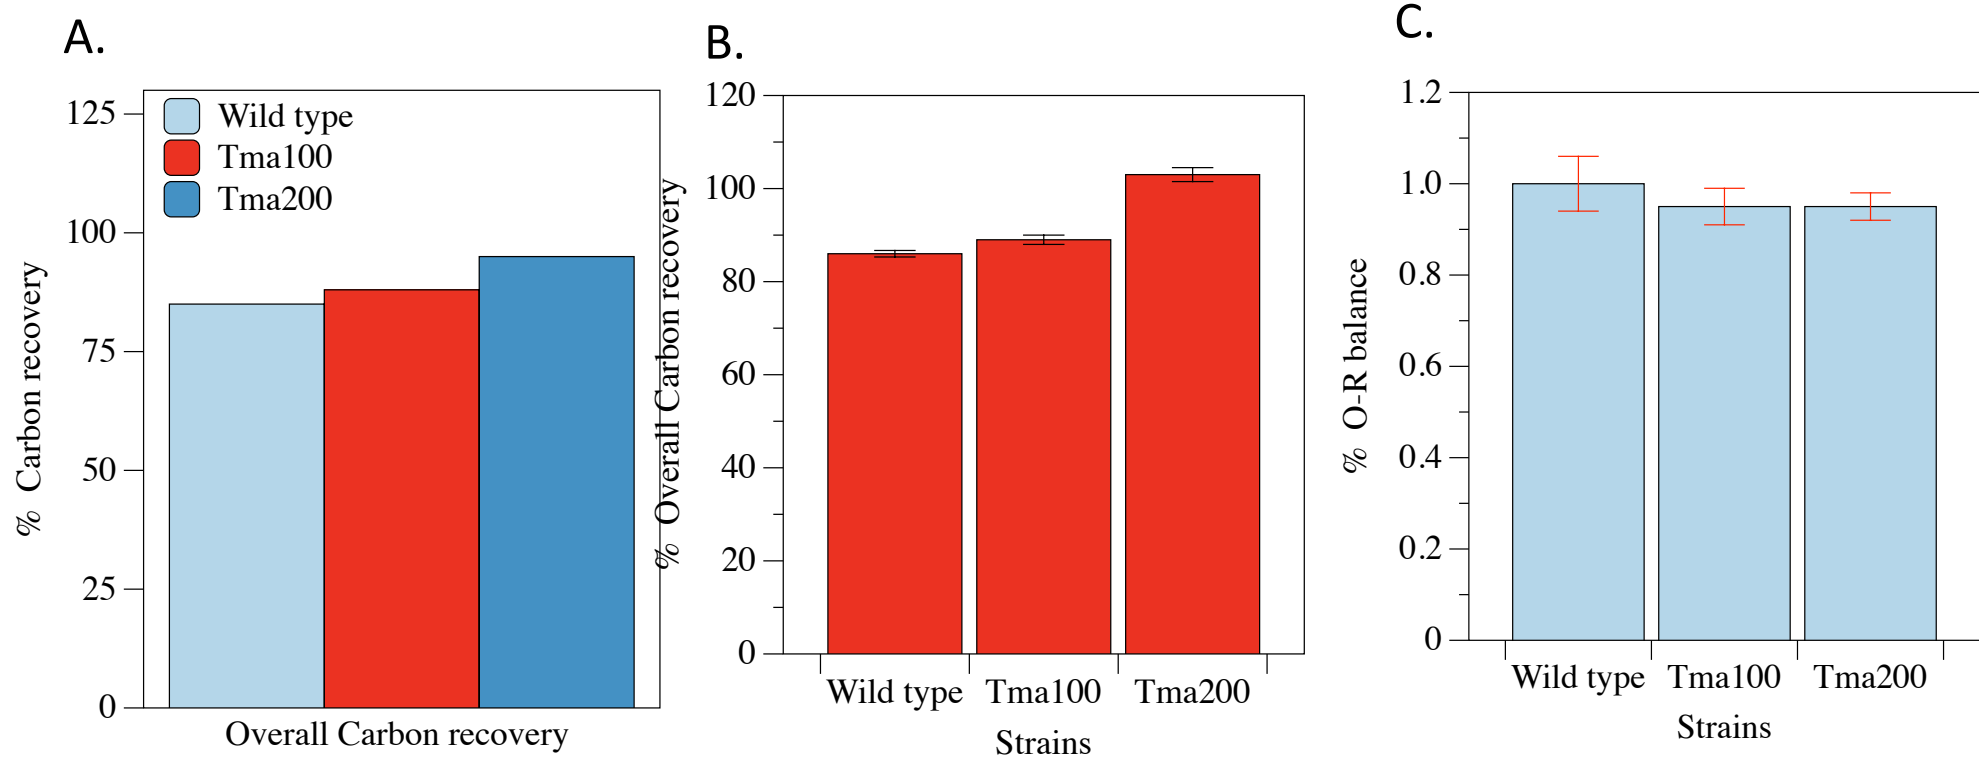

**Figure S4. Carbon recovery.** Carbon recovery in 30<sup>th</sup> hour of fermentation (panel A). The overall carbon recovery calculated as the ratio of maltose consumed to products (acetate, lactate, biomass and CO<sub>2</sub>) formed (panel B). Oxidation reduction (O-R) balance (panel C)

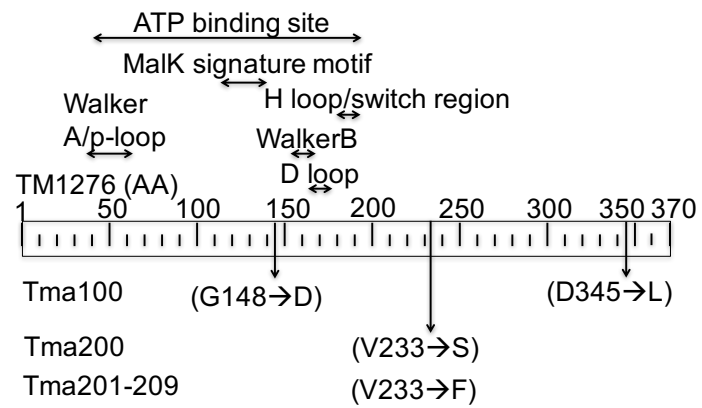

**Figure S5. Domain structure and mutations of *malK3*.** The diagram shows the features and predicted domains of *malK3*.

Substitution mutations are indicated by vertical arrows for respective strains along with their corresponding coordinates.

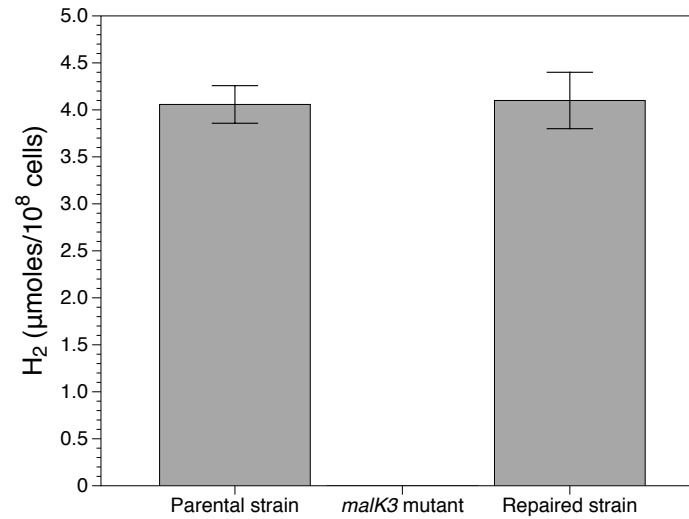

**Figure S6. Hydrogen production from a fully functional *malk3* strain and a strain with a complete loss of function mutation in the *malk3* gene.** All strains were grown in defined medium and incubated at 80°C for 24h and H<sub>2</sub> analysis was performed by GC. The error bars represent the standard deviations from two biological replicates.

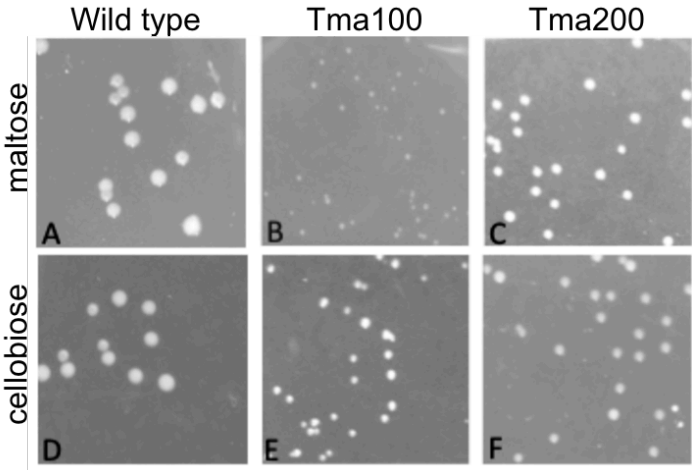

**Figure S7. Colony size variation in *T. maritima* strains.** Strains were grown on complex medium plates supplemented with 0.1% maltose (panel A, B and C) or 0.1% cellobiose (panel D, E and F), respectively.

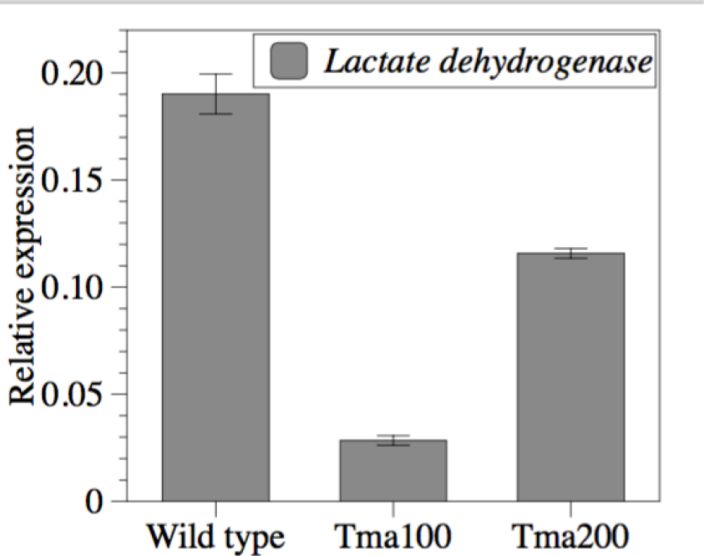

**Figure S8. Relative transcript abundance.** Lactate dehydrogenase (*ldh*) gene expression in various strains of *T. maritima*.



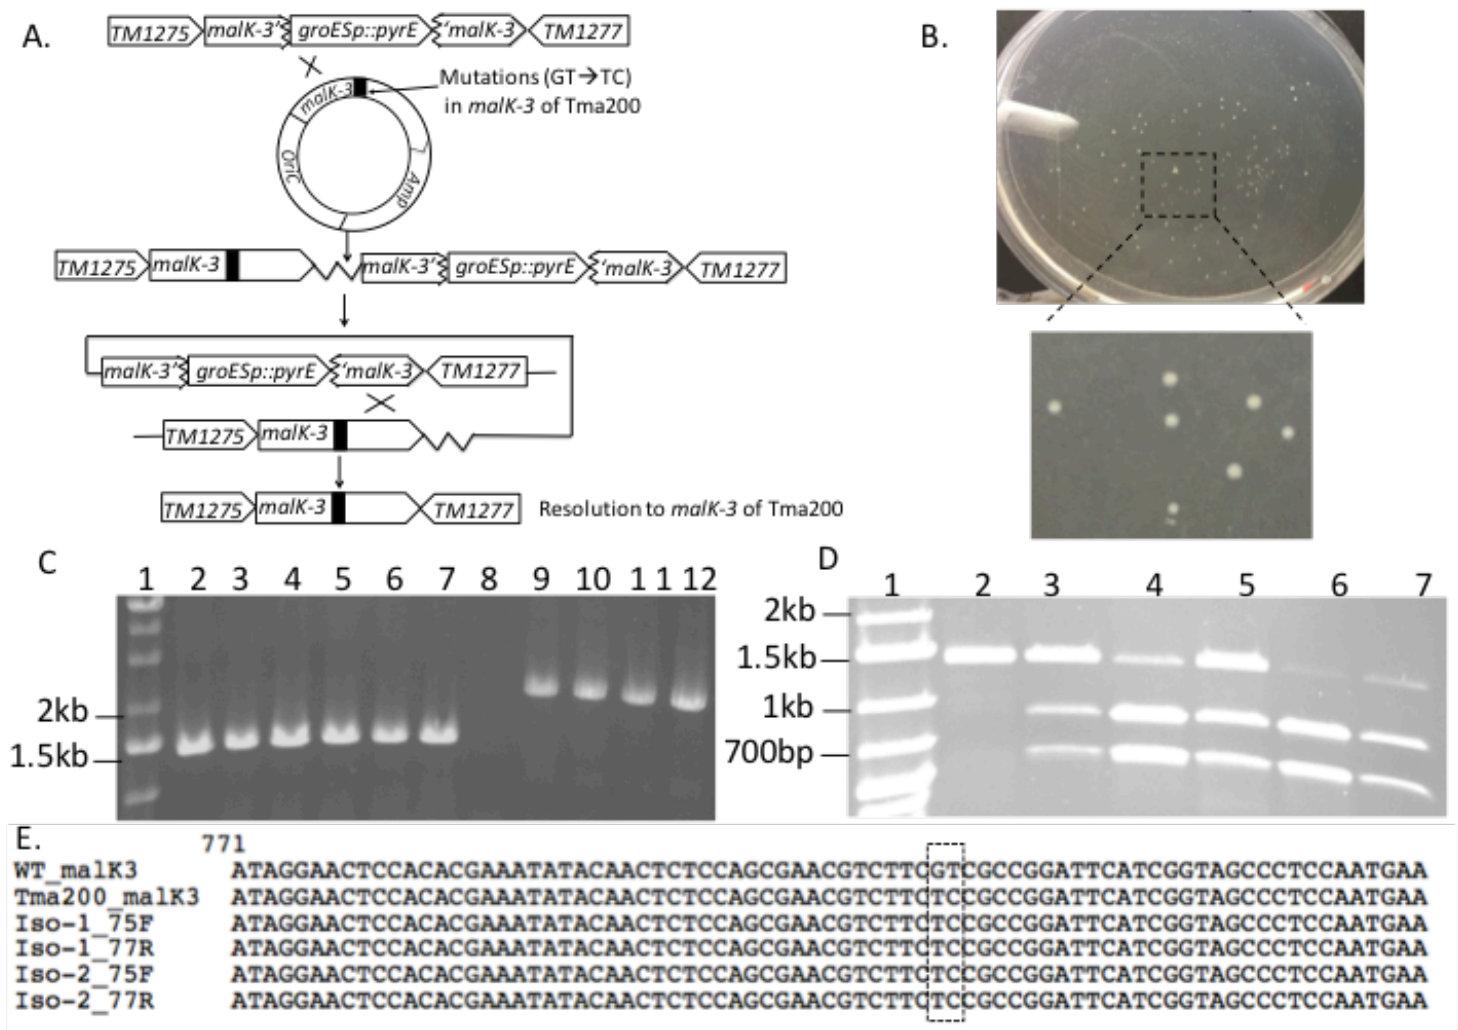

**Figure S9. Reconstruction of an excess H<sub>2</sub> trait by replacing the disrupted *malK3* allele of the *malK3* mutant with the *malK3* of Tma200.** **9A.** A schematic of crossover at the disrupted *malK3* allele of the *malK3* mutant and resolution into a strain possessing *malK3* allele of Tma200. **9B.** Colony phenotype of the strain repaired with *malK3* of Tma200. **9C.** PCR amplification of the *malK3* locus of the bigger colonies (lanes 2-7) and small colonies (lanes 8-12). **9D.** Restriction digestion of the PCR amplicon of bigger colonies with *Acil* (lane 3-7) and wild type (lane-2). **9E.** Sequencing of the *malK3* locus of the two isolates representing mutations in the *malK3* identical to the *malK3* of Tma200 strain.

1 **Table S1. Growth, cell yield and metabolites during exponential growth in**  
2 **bioreactors<sup>a</sup>.**

|                           | Wild type     | Tma100        | Tma200        |
|---------------------------|---------------|---------------|---------------|
| Generation time (minutes) | 65            | 100           | 86            |
| Biomass (mg cdw/L)        | 86.96 ± 0.45  | 47.55 ± 0.10  | 71.17 ± 0.01  |
| H <sub>2</sub> (mM)       | 10.07 ± 0.01  | 6.48 ± 0.03   | 12.15 ± 0.13  |
| H <sub>2</sub> (mM)/g cdw | 115.80 ± 0.23 | 135.64 ± 0.49 | 170.71 ± 2.60 |

3 <sup>a</sup>Parameters were obtained from studies using 3 L fermenters and values were  
4 determined during the initial growth phase (0-5 h).

5

6  
7  
8

**Table S2. Lactate excretion.**

| Strain    | Lactate (5h)<br>(mM) | Lactate (30 h)<br>(mM) |
|-----------|----------------------|------------------------|
| Wild type | 0.17±0.05            | 12.32±0.05             |
| Tma100    | <0.1mM               | <0.1mM                 |
| Tma200    | <0.1mM               | 2.92± 0.15             |

9 <sup>a</sup>Lactate was estimated from studies using 3 L fermenters after  
10 the times indicated.  
11

12

13

**Table S3. Summary of confirmed mutations.**

| <b>Mutant Strain</b> | <b>Substitution/ Deletion</b> | <b>Location of mutation/total length (AA)</b> | <b>ORF (numbering according to (1))</b> | <b>Gene Annotation</b>                                                                                 |
|----------------------|-------------------------------|-----------------------------------------------|-----------------------------------------|--------------------------------------------------------------------------------------------------------|
| Tma100               | G → A<br>(Gly → Glu)          | 148/369                                       | TM1276                                  | Maltose/maltodextrin transport ATP-binding protein (MalK) of an ABC transporter                        |
| Tma100               | G → A<br>(Glu → Lys)          | 345/369                                       | TM1276                                  | Maltose/maltodextrin transport ATP-binding protein (MalK) of an ABC transporter                        |
| Tma100 and Tma200    | G → A<br>(Trp → Stop)         | 229/614                                       | TM0460                                  | Peptide ABC transporter substrate binding protein                                                      |
| Tma200               | GT → TC<br>(Val → Ser)        | 233/369                                       | TM1276                                  | Maltose/maltodextrin transport ATP-binding protein (MalK) of an ABC transporter                        |
| Tma200               | G → A<br>(Ala → Phe)          | 1045/1690                                     | TM0459                                  | RNA polymerase, beta subunit                                                                           |
| Tma200               | ~10kb deletion                | Deletion from 5' of TM1322-3' of TM1332       | TM1322 – TM1331                         | Six hypothetical proteins, two astB/chuR-related protein and two lacI family transcriptional regulator |

14

15

**Table S4. Comparative analysis of inherited mutations.**

| Gene name/gene locus tag                                                            | Mutations in NC_000853.1, NC_023151.1 and NC_021214.1 | Mutations in laboratory wild type ( <i>T. maritima</i> ), Tma100 and Tma200        |
|-------------------------------------------------------------------------------------|-------------------------------------------------------|------------------------------------------------------------------------------------|
| Transcriptional regulator, LacI family <sup>a</sup> (TM0299)                        | NM                                                    | Arg→His<br>(Corresponds to coordinate-317059 of NC_000853.1)                       |
| Molecular chaperone <sup>a</sup> (groEL)<br><sup>a</sup> (TM0506)                   | NM                                                    | Glu→Lys<br>(Corresponds to coordinate-533154 of NC_000853.1)                       |
| (Sugar kinase, pfkB family)<br><sup>a</sup> (TM0828)                                | NM                                                    | Ala→Thr<br>(Corresponds to coordinate -854666 of NC_000853.1 )                     |
| Oxaloacetate decarboxylase, beta subunit<br><sup>a</sup> (TM0880)                   | NM                                                    | Lys→Phe<br>(Corresponds to coordinate-903233 of NC_000853.1)                       |
| Intergenic region<br>Between<br><sup>a</sup> (TM1145) and<br><sup>a</sup> (TM1146)  | NM                                                    | Intergenic region-no protein<br>(Corresponds to coordinate-1158469 of NC_000853.1) |
| Intergenic of malE <sup>a</sup> (TM1839)<br>and alpha amylase <sup>a</sup> (TM1840) | NM                                                    | Intergenic region- no protein<br>(corresponds to 1815578 of NC_000853.1)           |

17 NM-no mutation, <sup>a</sup> Gene locus tag as per NC\_000853.1.

18   References

19

20

- 21   1.     Nelson KE, Clayton RA, Gill SR, Gwinn ML, Dodson RJ, Haft DH, Hickey EK, Peterson JD, Nelson  
22         WC, Ketchum KA, McDonald L, Utterback TR, Malek JA, Linher KD, Garrett MM, Stewart AM,  
23         Cotton MD, Pratt MS, Phillips CA, Richardson D, Heidelberg J, Sutton GG, Fleischmann RD, Eisen  
24         JA, White O, Salzberg SL, Smith HO, Venter JC, Fraser CM. 1999. Evidence for lateral gene  
25         transfer between Archaea and bacteria from genome sequence of *Thermotoga maritima*.  
26         Nature 399:323-329.

27

28
